# Supplementary material for: PPARδ Agonism Activates Fatty Acid Oxidation via PGC-1α but Does Not Increase Mitochondrial Gene Expression and Function
Source: PubMed Central journal article supplement — J Biol Chem. 2009 May 12;284(28):18624–33. doi: 10.1074/jbc.M109.008797 (PMC2707195; doi:10.1074/jbc.m109.008797), 2009-05-12
Supplement: supp_M109.008797_Supplementary_Figure_FINAL.pdf [file supp_M109.008797_Supplementary_Figure_FINAL.pdf]

**Supplementary Fig.**

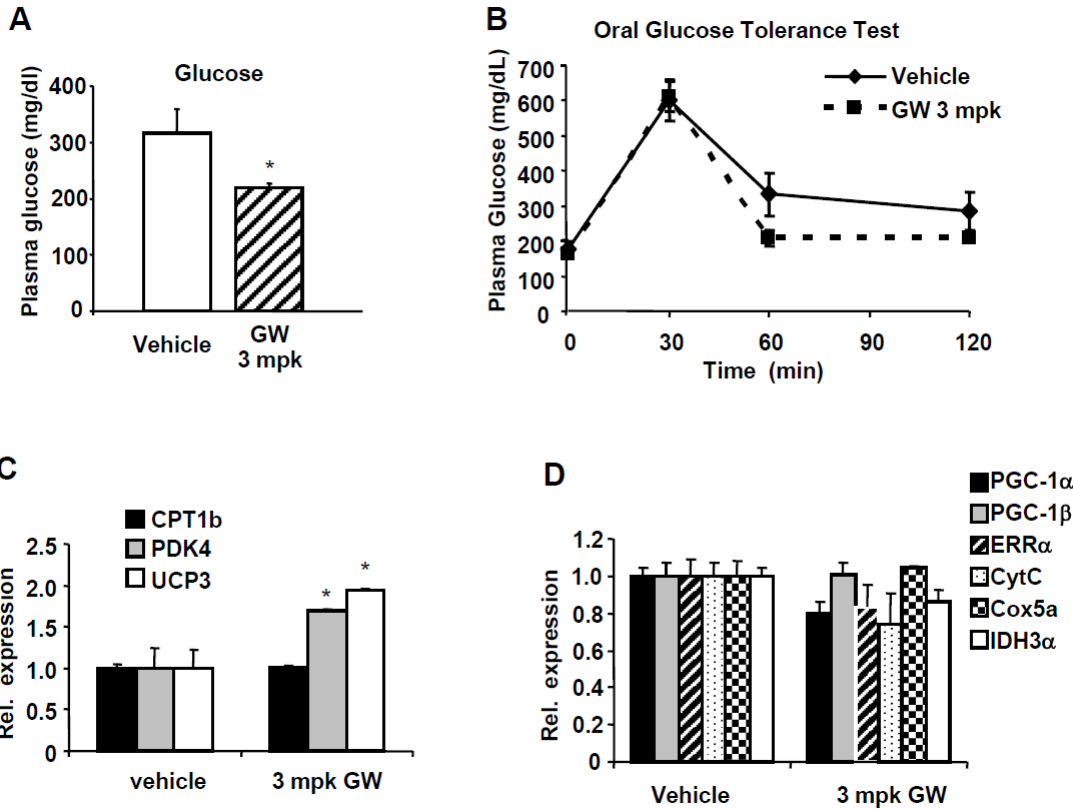

## SUPPLEMENTARY FIGURE LENDENDS

GW501516-induced effects on glucose homeostasis and muscle mitochondrial gene expression in *ob/ob* mice. *ob/ob* mice were treated once daily with 3 mpk GW501516 for 3 weeks. *A*. Plasma glucose was measured at day 19 post-treatment after 4 hr fast. *B*. OGTT from basal vs. vehicle, n=8, \*p≤0.05. *C* & *D*. Quadriceps muscle were isolated. RNA was extracted and Q-PCR was performed to determine the mRNA levels of the indicated genes. Data are mean ± SEM, n=8, \*p≤0.05 for vehicle vs. GW501516.
